# Supplementary material for: Rapid synthesis of MnS/NiCo-LDH heterostructures for high-performance supercapacitors
Source: Royal Society of Chemistry journal article supplement (doi:10.1039/d3nj01225e), 2023-01-01
Supplement: d3nj01225e1.pdf [file d3nj01225e1.pdf]

## Supplementary Information

### Rapid synthesis of MnS/NiCo-LDH heterostructure for high-performance supercapacitor

Xiaochen Cao,<sup>a</sup> Meini Yuan,<sup>\*a</sup> Congming Ding,<sup>a</sup> Xuebin Tang<sup>a</sup>

*a. School of Aerospace Engineering, North University of China, Taiyuan 030051, China. \* Corresponding author E-mail: [mnyuan@nuc.edu.cn](mailto:mnyuan@nuc.edu.cn)*

### Experimental Sections

#### Materials

Manganese chloride tetrahydrate ( $\text{MnCl}_2 \cdot 4\text{H}_2\text{O}$ ), Cobalt nitrate hexahydrate ( $\text{Co}(\text{NO}_3)_2 \cdot 6\text{H}_2\text{O}$ ), Nickel chloride hexahydrate ( $\text{NiCl}_2 \cdot 6\text{H}_2\text{O}$ ), Thiourea ( $\text{CS}(\text{NH}_4)_2$ ), Potassium hydroxide pellets (KOH) and Ethanol ( $\text{C}_2\text{H}_5\text{OH}$ ) were purchased from Sinopharm Chemical Reagent Co., Ltd. The chemicals were used directly without further purifications.

#### Preparation of electrodes

Preparation of MnS: MnS was prepared by cyclic voltammetry electrochemical deposition with an electrochemical workstation (CHI 660E). Ni foam ( $1 \times 2 \text{ cm}$ ) was rinsed separately with HCl, acetone, and deionized (DI) water for 20 min to eliminate impurities. In a typical synthesis, 0.198g of  $\text{MnCl}_2$  and 2.855g of  $\text{CH}_4\text{N}_2\text{S}$  were dissolved in 50 mL DI water for electrodeposition. The electrodeposition was carried out at  $5\text{mV} \cdot \text{s}^{-1}$  for 3 cycles within a potential between  $-1.2 - 0.2\text{V}$ . The MnS electrode was disposed with anhydrous alcohol repeatedly to get rid of the loosely bounded materials and it was then left to dry at  $60^\circ\text{C}$  overnight. The mass loading of MnS was about 1.1mg. The whole electrodeposition processes were described through the reactions below:

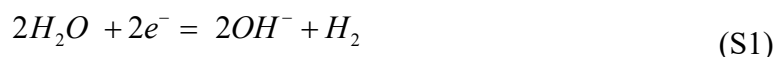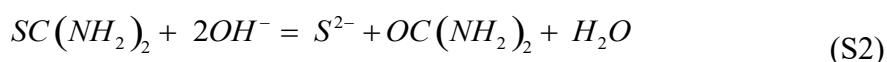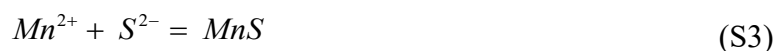

Preparation of MnS/NiCo-LDH: 0.291g  $\text{Co}(\text{NO}_3)_2 \cdot 6\text{H}_2\text{O}$  and 0.145g  $\text{NiCl}_2 \cdot 6\text{H}_2\text{O}$  were dissolved in 50 mL DI water to make the electrolyte. The deposition was also performed by cyclic voltammetry at  $5\text{mV} \cdot \text{s}^{-1}$  scan rate for 4 cycles with a potential between  $-1.2$  to  $0.2\text{V}$ . Then disposed with anhydrous alcohol repeatedly, the prepared material was dried at  $60^\circ\text{C}$  overnight. The mass loading of MnS/NiCo-LDH was about 2.7mg. Afterwards, we converted MnS to clean nickel foam and made NiCo-LDH using the same procedure. The reactions were described by the following:

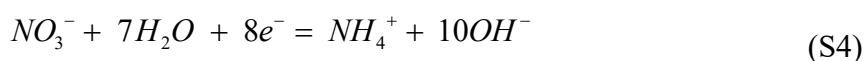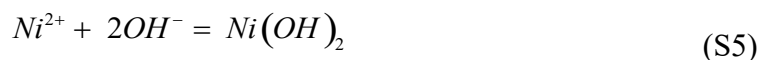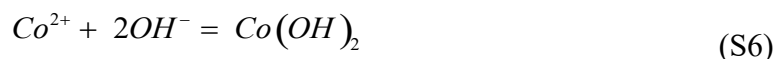

### Characterization techniques

The crystalline phases were analyzed by X-ray diffraction (XRD, Miniflex-600) in the  $2\theta = 10-80^\circ$  at  $2^\circ \text{ min}^{-1}$ . The microstructures were viewed by scanning electron microscope (SEM, ZEISS Gemini 300) and transmission electron microscope (TEM, FEI Talos F200X). X-ray photoelectron spectrometer (XPS, Thermo Scientific) was operated to interpret the elemental valence distribution. Electrochemical performances were performed in a three-electrode system with an electrochemical workstation (CHI660E) in 2 M KOH by cyclic voltammetry (CV), galvanostatic charge/discharge (GCD), Electrochemical impedance spectroscopy (EIS) and cycling tests, the prepared electrodes as working, Pt plate as counter and Ag/AgCl as reference electrodes. The specific capacitance  $C_m$  ( $\text{F} \cdot \text{g}^{-1}$ ) can be gained by using the formulas below:

$$C_m = \frac{I \Delta t}{m \Delta V} \quad (\text{S7})$$

where  $I$  ( $\text{A} \cdot \text{g}^{-1}$ ) and  $\Delta t$  (s) are the discharging current and time,  $m$  (g) is the active mass, and  $\Delta V$  (V) is the potential.

### Fabrication of ASC

A MnS/NiCo-LDH//CC ASC device was constructed applying MnS/NiCo-LDH (cathode), carbon electrode (anode) and 2 M KOH (electrolyte). The cellulose paper was used to separate two electrodes. The carbon electrode was formed by active carbon (AC), acetylene black and polytetrafluoroethylene (PTFE) (mass ratio = 8:1:1) in DI water. The MnS/NiCo-LDH and carbon electrode were balanced by the relationship below:

$$\frac{m^+}{m^-} = \frac{C_m^- \times \Delta V^-}{C_m^+ \times \Delta V^+} \quad (\text{S8})$$

The power density ( $P$ ) and energy density ( $E$ ) are gained as follows:

$$E = \frac{1}{7.2} C_m V^2 \quad (\text{S9})$$

$$P = \frac{3600 \times E}{t} \quad (\text{S10})$$

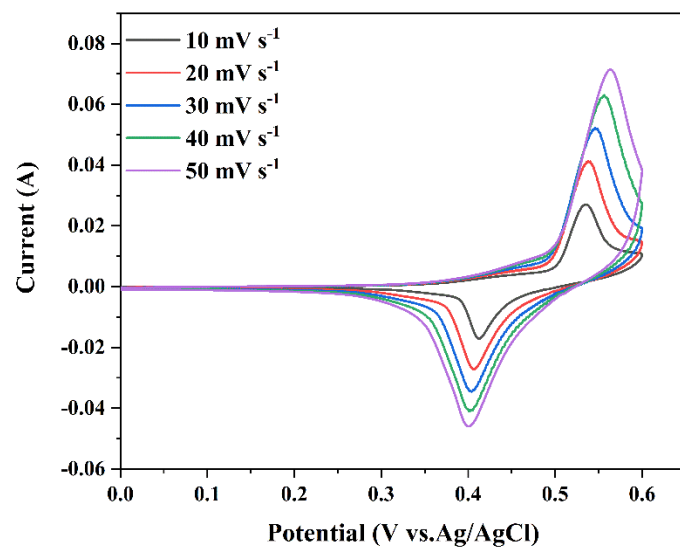

**Fig. S1.** CV plots of MnS at various scan rates.

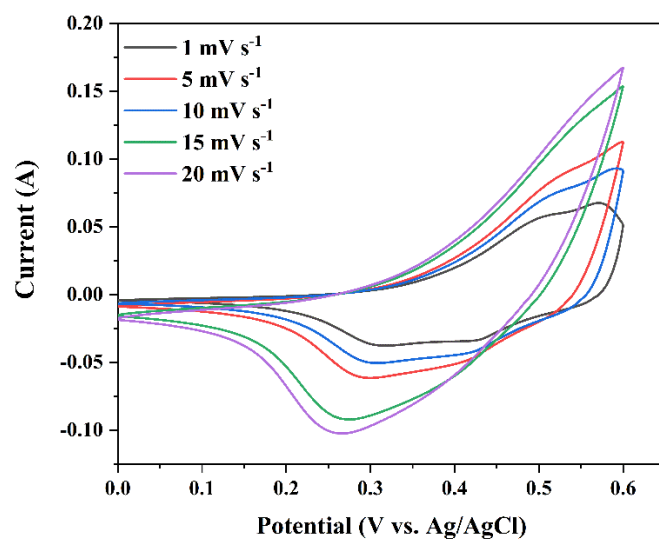

**Fig. S2.** CV plots of NiCo-LDH at various scan rates.

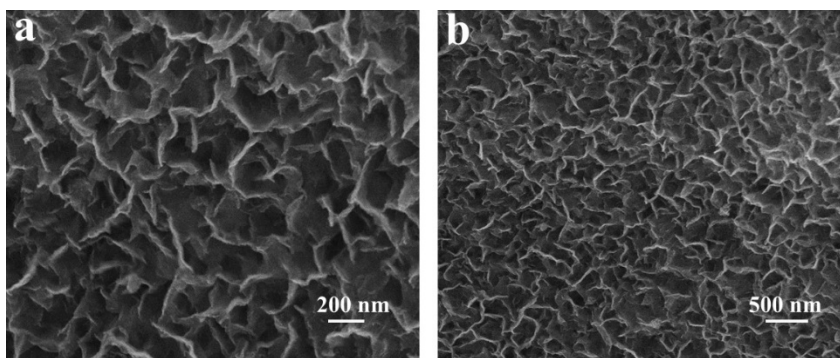

**Fig. S3.** (a, b) SEM images of NiCo-LDH removed from asymmetric supercapacitor after 5000 cycles
